# Supplementary material for: Genetic Structure of an East Asian Minnow (Toxabramis houdemeri) in Southern China, with Implications for Conservation
Source: MDPI journal article supplement (doi:10.3390/biology11111641), 2022-11-09
Supplement: s1 [file s1]

**Table S4:** Pairwise  $\phi_{ST}$  comparisons among *Toxabramis houdemeri* populations based on MCR. Statistically significant pairwise  $\phi_{ST}$  values are highlighted in bold ( $P < 0.05$ ). For population codes, refer to Table 1.

|    | BA           | FS           | GP           | GZ           | HC           | HX           | LC           | LU           | LX           | LZ           | NM           | NN           | RA           | YZ           | ZQ           | BS           | LD           | LG           | NF           | WJ           | QZ           | HZ           | LJ           |
|----|--------------|--------------|--------------|--------------|--------------|--------------|--------------|--------------|--------------|--------------|--------------|--------------|--------------|--------------|--------------|--------------|--------------|--------------|--------------|--------------|--------------|--------------|--------------|
| BA |              |              |              |              |              |              |              |              |              |              |              |              |              |              |              |              |              |              |              |              |              |              |              |
| FS | <b>0.530</b> |              |              |              |              |              |              |              |              |              |              |              |              |              |              |              |              |              |              |              |              |              |              |
| GP | <b>0.136</b> | <b>0.296</b> |              |              |              |              |              |              |              |              |              |              |              |              |              |              |              |              |              |              |              |              |              |
| GZ | <b>0.272</b> | <b>0.507</b> | <b>0.270</b> |              |              |              |              |              |              |              |              |              |              |              |              |              |              |              |              |              |              |              |              |
| HC | <b>0.630</b> | <b>0.995</b> | <b>0.614</b> | <b>0.443</b> |              |              |              |              |              |              |              |              |              |              |              |              |              |              |              |              |              |              |              |
| HX | 0.050        | <b>0.743</b> | <b>0.108</b> | <b>0.166</b> | <b>0.722</b> |              |              |              |              |              |              |              |              |              |              |              |              |              |              |              |              |              |              |
| LC | <b>0.121</b> | <b>0.366</b> | 0.028        | <b>0.203</b> | <b>0.555</b> | 0.034        |              |              |              |              |              |              |              |              |              |              |              |              |              |              |              |              |              |
| LU | 0.068        | <b>0.531</b> | 0.042        | <b>0.165</b> | <b>0.550</b> | -0.008       | -0.012       |              |              |              |              |              |              |              |              |              |              |              |              |              |              |              |              |
| LX | <b>0.491</b> | <b>0.875</b> | <b>0.544</b> | <b>0.339</b> | <b>0.631</b> | <b>0.527</b> | <b>0.439</b> | <b>0.394</b> |              |              |              |              |              |              |              |              |              |              |              |              |              |              |              |
| LZ | <b>0.156</b> | <b>0.387</b> | <b>0.102</b> | <b>0.193</b> | <b>0.442</b> | 0.022        | 0.037        | 0.031        | <b>0.361</b> |              |              |              |              |              |              |              |              |              |              |              |              |              |              |
| NM | 0.043        | <b>0.764</b> | <b>0.244</b> | <b>0.350</b> | <b>0.826</b> | 0.169        | <b>0.274</b> | <b>0.222</b> | <b>0.692</b> | <b>0.235</b> |              |              |              |              |              |              |              |              |              |              |              |              |              |
| NN | 0.051        | <b>0.669</b> | 0.012        | <b>0.198</b> | <b>0.802</b> | -0.050       | 0.020        | 0.009        | <b>0.627</b> | 0.036        | <b>0.181</b> |              |              |              |              |              |              |              |              |              |              |              |              |
| RA | <b>0.537</b> | -0.007       | <b>0.307</b> | <b>0.524</b> | <b>0.965</b> | <b>0.720</b> | <b>0.377</b> | <b>0.538</b> | <b>0.866</b> | <b>0.407</b> | <b>0.743</b> | <b>0.628</b> |              |              |              |              |              |              |              |              |              |              |              |
| YZ | <b>0.298</b> | 0.149        | <b>0.094</b> | <b>0.352</b> | <b>0.777</b> | <b>0.348</b> | 0.108        | <b>0.209</b> | <b>0.691</b> | <b>0.215</b> | <b>0.482</b> | <b>0.226</b> | <b>0.147</b> |              |              |              |              |              |              |              |              |              |              |
| ZQ | <b>0.190</b> | <b>0.603</b> | <b>0.247</b> | <b>0.206</b> | <b>0.435</b> | <b>0.157</b> | <b>0.138</b> | 0.072        | <b>0.145</b> | <b>0.163</b> | <b>0.374</b> | <b>0.224</b> | <b>0.612</b> | <b>0.368</b> |              |              |              |              |              |              |              |              |              |
| BS | <b>0.613</b> | <b>0.907</b> | <b>0.609</b> | <b>0.474</b> | <b>0.847</b> | <b>0.646</b> | <b>0.548</b> | <b>0.564</b> | <b>0.684</b> | <b>0.407</b> | <b>0.761</b> | <b>0.696</b> | <b>0.894</b> | <b>0.755</b> | <b>0.506</b> |              |              |              |              |              |              |              |              |
| LD | <b>0.597</b> | <b>0.908</b> | <b>0.593</b> | <b>0.455</b> | <b>0.846</b> | <b>0.628</b> | <b>0.527</b> | <b>0.542</b> | <b>0.672</b> | <b>0.385</b> | <b>0.752</b> | <b>0.682</b> | <b>0.894</b> | <b>0.745</b> | <b>0.486</b> | <b>0.244</b> |              |              |              |              |              |              |              |
| LG | <b>0.589</b> | <b>0.955</b> | <b>0.581</b> | <b>0.429</b> | <b>0.922</b> | <b>0.656</b> | <b>0.511</b> | <b>0.534</b> | <b>0.695</b> | <b>0.354</b> | <b>0.779</b> | <b>0.721</b> | <b>0.930</b> | <b>0.762</b> | <b>0.468</b> | <b>0.217</b> | <b>0.131</b> |              |              |              |              |              |              |
| NF | <b>0.599</b> | <b>0.924</b> | <b>0.590</b> | <b>0.450</b> | <b>0.869</b> | <b>0.629</b> | <b>0.525</b> | <b>0.537</b> | <b>0.690</b> | <b>0.383</b> | <b>0.758</b> | <b>0.686</b> | <b>0.906</b> | <b>0.746</b> | <b>0.493</b> | -0.003       | <b>0.317</b> | <b>0.332</b> |              |              |              |              |              |
| WJ | <b>0.523</b> | <b>0.958</b> | <b>0.509</b> | <b>0.361</b> | <b>0.922</b> | <b>0.522</b> | <b>0.421</b> | <b>0.413</b> | <b>0.650</b> | <b>0.276</b> | <b>0.723</b> | <b>0.615</b> | <b>0.925</b> | <b>0.700</b> | <b>0.401</b> | <b>0.179</b> | <b>0.104</b> | -0.037       | <b>0.279</b> |              |              |              |              |
| QZ | <b>0.585</b> | <b>0.891</b> | <b>0.583</b> | <b>0.450</b> | <b>0.820</b> | <b>0.602</b> | <b>0.514</b> | <b>0.525</b> | <b>0.652</b> | <b>0.378</b> | <b>0.734</b> | <b>0.656</b> | <b>0.880</b> | <b>0.730</b> | <b>0.474</b> | <b>0.046</b> | <b>0.063</b> | <b>0.078</b> | <b>0.096</b> | 0.040        |              |              |              |
| HZ | <b>0.508</b> | <b>0.906</b> | <b>0.500</b> | <b>0.376</b> | <b>0.873</b> | <b>0.536</b> | <b>0.434</b> | <b>0.452</b> | <b>0.682</b> | <b>0.253</b> | <b>0.698</b> | <b>0.582</b> | <b>0.884</b> | <b>0.693</b> | <b>0.427</b> | <b>0.737</b> | <b>0.729</b> | <b>0.776</b> | <b>0.752</b> | <b>0.743</b> | <b>0.703</b> |              |              |
| LJ | <b>0.591</b> | <b>0.947</b> | <b>0.577</b> | <b>0.446</b> | <b>0.934</b> | <b>0.673</b> | <b>0.533</b> | <b>0.569</b> | <b>0.763</b> | <b>0.343</b> | <b>0.776</b> | <b>0.711</b> | <b>0.923</b> | <b>0.765</b> | <b>0.521</b> | <b>0.810</b> | <b>0.807</b> | <b>0.861</b> | <b>0.831</b> | <b>0.850</b> | <b>0.783</b> | <b>0.092</b> |              |
| YC | <b>0.579</b> | <b>0.868</b> | <b>0.572</b> | <b>0.459</b> | <b>0.822</b> | <b>0.588</b> | <b>0.521</b> | <b>0.531</b> | <b>0.694</b> | <b>0.376</b> | <b>0.713</b> | <b>0.623</b> | <b>0.859</b> | <b>0.711</b> | <b>0.510</b> | <b>0.709</b> | <b>0.733</b> | <b>0.755</b> | <b>0.708</b> | <b>0.717</b> | <b>0.701</b> | <b>0.664</b> | <b>0.748</b> |
