# Supplementary material for: Genetic Structure of an East Asian Minnow (Toxabramis houdemeri) in Southern China, with Implications for Conservation
Source: MDPI journal article supplement (doi:10.3390/biology11111641), 2022-11-09
Supplement: s1 [file s1]

Table S2: Nucleotide substitution models used in EBSPs for each gene fragment.

| Gene           | Optimal model |
|----------------|---------------|
| Cytb           | GTR + G       |
| Control region | HKY + I       |
| RAG2           | GTR + I + G   |
