# Supplementary material for: Genetic Structure of an East Asian Minnow (Toxabramis houdemeri) in Southern China, with Implications for Conservation
Source: MDPI journal article supplement (doi:10.3390/biology11111641), 2022-11-09
Supplement: s1 [file s1]

**Table S5:** Pairwise  $\phi_{ST}$  comparisons among *Toxabramis houdemeri* populations based on *RAG2*. Statistically significant pairwise  $\phi_{ST}$  values are highlighted in bold ( $P < 0.05$ ). For population codes, refer to Table 1.

|    | BA           | FS           | GP           | GZ           | HC           | HX           | LC           | LU           | LX           | LZ           | NM           | NN           | RA           | YZ           | ZQ           | BS           | LD           | LG           | NF           | WJ           | QZ           | HZ           | LJ           |
|----|--------------|--------------|--------------|--------------|--------------|--------------|--------------|--------------|--------------|--------------|--------------|--------------|--------------|--------------|--------------|--------------|--------------|--------------|--------------|--------------|--------------|--------------|--------------|
| BA |              |              |              |              |              |              |              |              |              |              |              |              |              |              |              |              |              |              |              |              |              |              |              |
| FS | <b>0.172</b> |              |              |              |              |              |              |              |              |              |              |              |              |              |              |              |              |              |              |              |              |              |              |
| GP | <b>0.098</b> | <b>0.067</b> |              |              |              |              |              |              |              |              |              |              |              |              |              |              |              |              |              |              |              |              |              |
| GZ | <b>0.418</b> | <b>0.556</b> | <b>0.387</b> |              |              |              |              |              |              |              |              |              |              |              |              |              |              |              |              |              |              |              |              |
| HC | <b>0.121</b> | <b>0.162</b> | <b>0.051</b> | <b>0.476</b> |              |              |              |              |              |              |              |              |              |              |              |              |              |              |              |              |              |              |              |
| HX | 0.050        | <b>0.081</b> | -0.002       | <b>0.529</b> | <b>0.104</b> |              |              |              |              |              |              |              |              |              |              |              |              |              |              |              |              |              |              |
| LC | <b>0.098</b> | 0.030        | 0.027        | <b>0.493</b> | 0.036        | 0.057        |              |              |              |              |              |              |              |              |              |              |              |              |              |              |              |              |              |
| LU | 0.010        | <b>0.062</b> | 0.041        | <b>0.557</b> | <b>0.087</b> | 0.030        | 0.005        |              |              |              |              |              |              |              |              |              |              |              |              |              |              |              |              |
| LX | <b>0.187</b> | <b>0.290</b> | <b>0.166</b> | <b>0.128</b> | <b>0.109</b> | <b>0.152</b> | <b>0.201</b> | <b>0.212</b> |              |              |              |              |              |              |              |              |              |              |              |              |              |              |              |
| LZ | <b>0.246</b> | <b>0.124</b> | <b>0.216</b> | <b>0.669</b> | <b>0.316</b> | <b>0.200</b> | <b>0.167</b> | <b>0.140</b> | <b>0.451</b> |              |              |              |              |              |              |              |              |              |              |              |              |              |              |
| NM | <b>0.175</b> | <b>0.294</b> | <b>0.135</b> | <b>0.124</b> | <b>0.148</b> | <b>0.158</b> | <b>0.211</b> | <b>0.225</b> | <b>0.032</b> | <b>0.463</b> |              |              |              |              |              |              |              |              |              |              |              |              |              |
| NN | 0.037        | <b>0.228</b> | <b>0.080</b> | <b>0.519</b> | <b>0.157</b> | 0.029        | <b>0.146</b> | 0.072        | <b>0.200</b> | <b>0.297</b> | <b>0.180</b> |              |              |              |              |              |              |              |              |              |              |              |              |
| RA | <b>0.186</b> | <b>0.295</b> | <b>0.145</b> | <b>0.093</b> | <b>0.140</b> | <b>0.159</b> | <b>0.214</b> | <b>0.225</b> | <b>0.029</b> | <b>0.470</b> | -0.015       | <b>0.187</b> |              |              |              |              |              |              |              |              |              |              |              |
| YZ | <b>0.238</b> | <b>0.064</b> | <b>0.109</b> | <b>0.718</b> | <b>0.255</b> | <b>0.169</b> | <b>0.092</b> | <b>0.127</b> | <b>0.420</b> | <b>0.074</b> | <b>0.457</b> | <b>0.290</b> | <b>0.441</b> |              |              |              |              |              |              |              |              |              |              |
| ZQ | <b>0.162</b> | <b>0.244</b> | <b>0.105</b> | <b>0.155</b> | <b>0.060</b> | <b>0.126</b> | <b>0.149</b> | <b>0.176</b> | <b>0.028</b> | <b>0.429</b> | -0.001       | <b>0.169</b> | 0.009        | <b>0.378</b> |              |              |              |              |              |              |              |              |              |
| BS | <b>0.509</b> | <b>0.432</b> | <b>0.495</b> | <b>0.841</b> | <b>0.631</b> | <b>0.547</b> | <b>0.483</b> | <b>0.473</b> | <b>0.673</b> | <b>0.191</b> | <b>0.717</b> | <b>0.604</b> | <b>0.692</b> | <b>0.410</b> | <b>0.670</b> |              |              |              |              |              |              |              |              |
| LD | <b>0.335</b> | <b>0.261</b> | <b>0.356</b> | <b>0.747</b> | <b>0.466</b> | <b>0.340</b> | <b>0.316</b> | <b>0.262</b> | <b>0.553</b> | <b>0.070</b> | <b>0.573</b> | <b>0.416</b> | <b>0.572</b> | <b>0.240</b> | <b>0.542</b> | <b>0.146</b> |              |              |              |              |              |              |              |
| LG | <b>0.445</b> | <b>0.385</b> | <b>0.425</b> | <b>0.823</b> | <b>0.556</b> | <b>0.424</b> | <b>0.424</b> | <b>0.391</b> | <b>0.616</b> | <b>0.172</b> | <b>0.654</b> | <b>0.486</b> | <b>0.641</b> | <b>0.351</b> | <b>0.615</b> | <b>0.036</b> | <b>0.142</b> |              |              |              |              |              |              |
| NF | <b>0.439</b> | <b>0.380</b> | <b>0.429</b> | <b>0.806</b> | <b>0.556</b> | <b>0.415</b> | <b>0.429</b> | <b>0.396</b> | <b>0.617</b> | <b>0.185</b> | <b>0.646</b> | <b>0.478</b> | <b>0.638</b> | <b>0.349</b> | <b>0.612</b> | <b>0.159</b> | <b>0.134</b> | <b>0.126</b> |              |              |              |              |              |
| WJ | <b>0.377</b> | <b>0.297</b> | <b>0.382</b> | <b>0.755</b> | <b>0.489</b> | <b>0.371</b> | <b>0.350</b> | <b>0.308</b> | <b>0.573</b> | <b>0.093</b> | <b>0.593</b> | <b>0.444</b> | <b>0.591</b> | <b>0.265</b> | <b>0.564</b> | <b>0.064</b> | 0.014        | <b>0.081</b> | <b>0.057</b> |              |              |              |              |
| QZ | <b>0.418</b> | <b>0.320</b> | <b>0.364</b> | <b>0.855</b> | <b>0.523</b> | <b>0.369</b> | <b>0.367</b> | <b>0.352</b> | <b>0.588</b> | <b>0.121</b> | <b>0.652</b> | <b>0.449</b> | <b>0.625</b> | <b>0.277</b> | <b>0.590</b> | 0.051        | <b>0.147</b> | 0.021        | <b>0.123</b> | <b>0.079</b> |              |              |              |
| HZ | <b>0.402</b> | <b>0.304</b> | <b>0.387</b> | <b>0.810</b> | <b>0.545</b> | <b>0.393</b> | <b>0.376</b> | <b>0.349</b> | <b>0.606</b> | <b>0.083</b> | <b>0.644</b> | <b>0.485</b> | <b>0.628</b> | <b>0.265</b> | <b>0.597</b> | <b>0.248</b> | <b>0.089</b> | <b>0.212</b> | <b>0.151</b> | <b>0.092</b> | <b>0.207</b> |              |              |
| LJ | <b>0.238</b> | <b>0.218</b> | <b>0.275</b> | <b>0.603</b> | <b>0.335</b> | <b>0.206</b> | <b>0.246</b> | <b>0.178</b> | <b>0.436</b> | <b>0.108</b> | <b>0.421</b> | <b>0.258</b> | <b>0.449</b> | <b>0.197</b> | <b>0.421</b> | <b>0.249</b> | <b>0.084</b> | <b>0.205</b> | <b>0.137</b> | <b>0.110</b> | <b>0.188</b> | <b>0.071</b> |              |
| YC | <b>0.501</b> | <b>0.640</b> | <b>0.474</b> | <b>0.064</b> | <b>0.665</b> | <b>0.698</b> | <b>0.599</b> | <b>0.688</b> | <b>0.229</b> | <b>0.719</b> | <b>0.304</b> | <b>0.670</b> | <b>0.195</b> | <b>0.803</b> | <b>0.274</b> | <b>0.880</b> | <b>0.791</b> | <b>0.871</b> | <b>0.849</b> | <b>0.795</b> | <b>0.925</b> | <b>0.858</b> | <b>0.636</b> |
