# Supplementary material for: Genetic Structure of an East Asian Minnow (Toxabramis houdemeri) in Southern China, with Implications for Conservation
Source: MDPI journal article supplement (doi:10.3390/biology11111641), 2022-11-09
Supplement: s1 [file s1]

**Table S3:** Nonhierarchical AMOVA of *Toxabramis houdemeri* populations among the Pearl River and Hainan Island populations.

|               | Source of variation  | MCR                     |                   |         | RAG2                    |                   |         |
|---------------|----------------------|-------------------------|-------------------|---------|-------------------------|-------------------|---------|
|               |                      | Percentage of variation | $\Phi$ -statistic | P-value | Percentage of variation | $\Phi$ -statistic | P-value |
| Pearl River   | Grouped by locations |                         |                   |         |                         |                   |         |
|               | Among populations    | 37.05                   | 0.371             | < 0.001 | 24.00                   | 0.240             | < 0.001 |
|               | Within populations   | 62.95                   | 0.629             |         | 76.00                   | 0.760             |         |
| Hainan Island | Grouped by locations |                         |                   |         |                         |                   |         |
|               | Among populations    | 14.90                   | 0.149             | < 0.001 | 9.31                    | 0.093             | < 0.001 |
|               | Within populations   | 85.10                   | 0.851             |         | 90.69                   | 0.907             |         |
