# Supplementary material for: Genetic Structure of an East Asian Minnow (Toxabramis houdemeri) in Southern China, with Implications for Conservation
Source: MDPI journal article supplement (doi:10.3390/biology11111641), 2022-11-09
Supplement: s1 [file s1]

Table S6: Neutrality tests and mismatch distribution analyses of Tajima's  $D$  and Fu's  $F_S$  for global *Toxabramis houdemeri* populations. SSD, sum of squared distribution; Hri, Harpending's raggedness index;  $P$ , the probability value.

|      | Tajima's $D$ ( $P$ ) | Fu's $F_S$ ( $P$ ) | SSD ( $P$ )   | Hri ( $P$ )   |
|------|----------------------|--------------------|---------------|---------------|
| MCR  | -1.819 (0.000)       | -24.032 (0.006)    | 0.005 (0.355) | 0.008 (0.421) |
| RAG2 | -1.549 (0.019)       | -24.700 (0.000)    | 0.003 (0.690) | 0.013 (0.740) |
