# Supplementary material for: Genetic Structure of an East Asian Minnow (Toxabramis houdemeri) in Southern China, with Implications for Conservation
Source: MDPI journal article supplement (doi:10.3390/biology11111641), 2022-11-09
Supplement: s1 [file s1]

Table S1: Details of sample locations for *Toxabramis houdemeri*. The locations, coordinates (latitude/longitude), sample dates, sample sizes, voucher numbers, and GenBank accession numbers for *Cytb*, the control region, and *RAG2* are presented.

| Locality (Codes)           | Sample Date  | Lat    | Long    | River    | Sample size | Voucher No. | Genbank nos |                |          |
|----------------------------|--------------|--------|---------|----------|-------------|-------------|-------------|----------------|----------|
|                            |              |        |         |          |             |             | Cytb        | Control Region | RAG2     |
| Baise, Baise, Guangxi (BA) | 20 Jul, 2019 | 23.891 | 106.620 | Pearl R. | 28          | BA116       | OP500118    | OP500645       | OP501144 |
|                            |              |        |         |          |             | BA117       | OP500119    | OP500646       | OP501145 |
|                            |              |        |         |          |             | BA118       | OP500120    | OP500647       | OP501146 |
|                            |              |        |         |          |             | BA119       | OP500121    | OP500648       | OP501147 |
|                            |              |        |         |          |             | BA120       | OP500122    | OP500649       | OP501148 |
|                            |              |        |         |          |             | BA121       | OP500123    | OP500650       | OP501149 |
|                            |              |        |         |          |             | BA122       | OP500124    | OP500651       | OP501150 |
|                            |              |        |         |          |             | BA123       | OP500125    | OP500652       | OP501151 |
|                            |              |        |         |          |             | BA124       | OP500126    | OP500653       | OP501152 |
|                            |              |        |         |          |             | BA125       | OP500127    | OP500654       | OP501153 |
|                            |              |        |         |          |             | BA126       | OP500128    | OP500655       | OP501154 |
|                            |              |        |         |          |             | BA127       | OP500129    | OP500656       | OP501155 |
|                            |              |        |         |          |             | BA128       | OP500130    | OP500657       | OP501156 |
|                            |              |        |         |          |             | BA129       | OP500131    | OP500658       | OP501157 |
|                            |              |        |         |          |             | BA130       | OP500132    | OP500659       | OP501158 |
|                            |              |        |         |          |             | BA131       | OP500133    | OP500660       | OP501159 |
|                            |              |        |         |          |             | BA132       | OP500134    | OP500661       | OP501160 |
|                            |              |        |         |          |             | BA133       | OP500135    | OP500662       | OP501161 |
|                            |              |        |         |          |             | BA134       | OP500136    | OP500663       | OP501162 |
|                            |              |        |         |          |             | BA135       | OP500137    | OP500664       | OP501163 |
|                            |              |        |         |          |             | BA136       | OP500138    | OP500665       | OP501164 |

|                                  |              |        |         |          |    |       |          |          |          |
|----------------------------------|--------------|--------|---------|----------|----|-------|----------|----------|----------|
| Longzhou, Chongzuo, Guangxi (LZ) | 18 Jul, 2019 | 22.338 | 106.853 | Pearl R. | 26 | BA137 | OP500139 | OP500666 | OP501165 |
|                                  |              |        |         |          |    | BA138 | OP500140 | OP500667 | OP501166 |
|                                  |              |        |         |          |    | BA139 | OP500141 | OP500668 | OP501167 |
|                                  |              |        |         |          |    | BA140 | OP500142 | OP500669 | OP501168 |
|                                  |              |        |         |          |    | BA141 | OP500143 | OP500670 | OP501169 |
|                                  |              |        |         |          |    | BA142 | OP500144 | OP500671 | OP501170 |
|                                  |              |        |         |          |    | BA143 | OP500145 | OP500672 | OP501171 |
|                                  |              |        |         |          |    | LZ183 | OP500404 | OP500931 | OP501449 |
|                                  |              |        |         |          |    | LZ184 | OP500405 | OP500932 | OP501450 |
|                                  |              |        |         |          |    | LZ185 | OP500406 | OP500933 | OP501451 |
|                                  |              |        |         |          |    | LZ186 | OP500407 | OP500934 | OP501452 |
|                                  |              |        |         |          |    | LZ187 | OP500408 | OP500935 | OP501453 |
|                                  |              |        |         |          |    | LZ188 | OP500409 | OP500936 | OP501454 |
|                                  |              |        |         |          |    | LZ189 | OP500410 | OP500937 | OP501455 |
|                                  |              |        |         |          |    | LZ190 | OP500411 | OP500938 | OP501456 |
|                                  |              |        |         |          |    | LZ191 | OP500412 | OP500939 | OP501457 |
|                                  |              |        |         |          |    | LZ192 | OP500413 | OP500940 | OP501458 |
|                                  |              |        |         |          |    | LZ193 | OP500414 | OP500941 | OP501459 |
|                                  |              |        |         |          |    | LZ194 | OP500415 | OP500942 | OP501460 |
|                                  |              |        |         |          |    | LZ195 | OP500416 | OP500943 | OP501461 |
|                                  |              |        |         |          |    | LZ196 | OP500417 | OP500944 | OP501462 |
|                                  |              |        |         |          |    | LZ197 | OP500418 | OP500945 | OP501463 |
|                                  |              |        |         |          |    | LZ198 | OP500419 | OP500946 | OP501464 |
|                                  |              |        |         |          |    | LZ199 | OP500420 | OP500947 | OP501465 |
|                                  |              |        |         |          |    | LZ200 | OP500421 | OP500948 | OP501466 |
|                                  |              |        |         |          |    | LZ201 | OP500422 | OP500949 | OP501467 |

|                                  |              |        |         |          |    |       |          |          |          |
|----------------------------------|--------------|--------|---------|----------|----|-------|----------|----------|----------|
| Ningming, Chongzuo, Guangxi (NM) | 19 Jul, 2019 | 22.141 | 107.075 | Pearl R. | 17 | LZ202 | OP500423 | OP500950 | OP501468 |
|                                  |              |        |         |          |    | LZ203 | OP500424 | OP500951 | OP501469 |
|                                  |              |        |         |          |    | LZ204 | OP500425 | OP500952 | OP501470 |
|                                  |              |        |         |          |    | LZ205 | OP500426 | OP500953 | OP501471 |
|                                  |              |        |         |          |    | LZ206 | OP500427 | OP500954 | OP501472 |
|                                  |              |        |         |          |    | LZ207 | OP500428 | OP500955 | OP501473 |
|                                  |              |        |         |          |    | LZ209 | OP500429 | OP500956 | OP501474 |
|                                  |              |        |         |          |    | NM144 | OP500450 | OP500977 | OP501495 |
|                                  |              |        |         |          |    | NM145 | OP500451 | OP500978 | OP501496 |
|                                  |              |        |         |          |    | NM146 | OP500452 | OP500979 | OP501497 |
|                                  |              |        |         |          |    | NM147 | OP500453 | OP500980 | OP501498 |
|                                  |              |        |         |          |    | NM148 | OP500454 | OP500981 | OP501499 |
|                                  |              |        |         |          |    | NM149 | OP500455 | OP500982 | OP501500 |
|                                  |              |        |         |          |    | NM150 | OP500456 | OP500983 |          |
|                                  |              |        |         |          |    | NM151 | OP500457 | OP500984 | OP501501 |
|                                  |              |        |         |          |    | NM152 | OP500458 | OP500985 | OP501502 |
|                                  |              |        |         |          |    | NM153 | OP500459 | OP500986 | OP501503 |
| Fushui, Nanning, Guangxi (FS)    | 17 Jul, 2019 | 22.635 | 107.899 | Pearl R. | 22 | NM154 | OP500460 | OP500987 |          |
|                                  |              |        |         |          |    | NM155 | OP500461 | OP500988 | OP501504 |
|                                  |              |        |         |          |    | NM156 | OP500462 | OP500989 | OP501505 |
|                                  |              |        |         |          |    | NM157 | OP500463 | OP500990 | OP501506 |
|                                  |              |        |         |          |    | NM158 | OP500464 | OP500991 | OP501507 |
|                                  |              |        |         |          |    | NM159 | OP500465 | OP500992 | OP501508 |
|                                  |              |        |         |          |    | NM160 | OP500466 | OP500993 | OP501509 |
|                                  |              |        |         |          |    | FS161 | OP500178 | OP500705 | OP501203 |
|                                  |              |        |         |          |    | FS162 | OP500179 | OP500706 | OP501204 |

|                                |              |        |         |          |   |       |          |          |          |
|--------------------------------|--------------|--------|---------|----------|---|-------|----------|----------|----------|
| Nanning, Nanning, Guangxi (NN) | 22 Sep, 2018 | 22.803 | 108.320 | Pearl R. | 7 | FS163 | OP500180 | OP500707 | OP501205 |
|                                |              |        |         |          |   | FS164 | OP500181 | OP500708 | OP501206 |
|                                |              |        |         |          |   | FS165 | OP500182 | OP500709 | OP501207 |
|                                |              |        |         |          |   | FS166 | OP500183 | OP500710 | OP501208 |
|                                |              |        |         |          |   | FS167 | OP500184 | OP500711 | OP501209 |
|                                |              |        |         |          |   | FS168 | OP500185 | OP500712 | OP501210 |
|                                |              |        |         |          |   | FS169 | OP500186 | OP500713 | OP501211 |
|                                |              |        |         |          |   | FS170 | OP500187 | OP500714 | OP501212 |
|                                |              |        |         |          |   | FS171 | OP500188 | OP500715 | OP501213 |
|                                |              |        |         |          |   | FS172 | OP500189 | OP500716 | OP501214 |
|                                |              |        |         |          |   | FS173 | OP500190 | OP500717 | OP501215 |
|                                |              |        |         |          |   | FS174 | OP500191 | OP500718 | OP501216 |
|                                |              |        |         |          |   | FS175 | OP500192 | OP500719 | OP501217 |
|                                |              |        |         |          |   | FS176 | OP500193 | OP500720 | OP501218 |
|                                |              |        |         |          |   | FS177 | OP500194 | OP500721 | OP501219 |
|                                |              |        |         |          |   | FS178 | OP500195 | OP500722 | OP501220 |
|                                |              |        |         |          |   | FS179 | OP500196 | OP500723 | OP501221 |
|                                |              |        |         |          |   | FS180 | OP500197 | OP500724 | OP501222 |
|                                |              |        |         |          |   | FS181 | OP500198 | OP500725 | OP501223 |
|                                |              |        |         |          |   | FS182 | OP500199 | OP500726 | OP501224 |
|                                |              |        |         |          |   | NN216 | OP500467 | OP500994 | OP501510 |
|                                |              |        |         |          |   | NN217 | OP500468 | OP500995 | OP501511 |
|                                |              |        |         |          |   | NN218 | OP500469 | OP500996 | OP501512 |
|                                |              |        |         |          |   | NN219 | OP500470 | OP500997 | OP501513 |
|                                |              |        |         |          |   | NN220 | OP500471 | OP500998 | OP501514 |
|                                |              |        |         |          |   | NN221 | OP500472 | OP500999 | OP501515 |

|                                 |              |        |         |          |    |       |          |          |          |
|---------------------------------|--------------|--------|---------|----------|----|-------|----------|----------|----------|
| Hengxian, Nanning, Guangxi (HX) | 20 Sep, 2018 | 22.670 | 109.263 | Pearl R. |    | NN222 | OP500473 | OP501000 | OP501516 |
|                                 |              |        |         |          |    | HX210 | OP500270 | OP500797 | OP501295 |
|                                 |              |        |         |          |    | HX211 | OP500271 | OP500798 | OP501296 |
|                                 |              |        |         |          |    | HX212 | OP500272 | OP500799 | OP501297 |
|                                 |              |        |         |          |    | HX213 | OP500273 | OP500800 | OP501298 |
|                                 |              |        |         |          |    | HX214 | OP500274 | OP500801 | OP501299 |
|                                 |              |        |         |          |    | HX215 | OP500275 | OP500802 | OP501300 |
| Duan, Hechi, Guangxi (DA)       | 7 May, 2020  | 23.851 | 108.129 | Pearl R. | 2  | DA502 | OP500176 | OP500703 | OP501202 |
|                                 |              |        |         |          |    | DA503 | OP500177 | OP500704 |          |
| Hechi, Hechi, Guangxi (HC)      | 6 Jul, 2018  | 24.697 | 108.064 | Pearl R. | 11 | HC306 | OP500259 | OP500786 | OP501284 |
|                                 |              |        |         |          |    | HC307 | OP500260 | OP500787 | OP501285 |
|                                 |              |        |         |          |    | HC308 | OP500261 | OP500788 | OP501286 |
|                                 |              |        |         |          |    | HC309 | OP500262 | OP500789 | OP501287 |
|                                 |              |        |         |          |    | HC310 | OP500263 | OP500790 | OP501288 |
|                                 |              |        |         |          |    | HC311 | OP500264 | OP500791 | OP501289 |
|                                 |              |        |         |          |    | HC312 | OP500265 | OP500792 | OP501290 |
|                                 |              |        |         |          |    | HC313 | OP500266 | OP500793 | OP501291 |
|                                 |              |        |         |          |    | HC314 | OP500267 | OP500794 | OP501292 |
|                                 |              |        |         |          |    | HC315 | OP500268 | OP500795 | OP501293 |
|                                 |              |        |         |          |    | HC316 | OP500269 | OP500796 | OP501294 |
| Yizhou, Hechi, Guangxi (YZ)     | 7 Jul, 2018  | 24.501 | 108.642 | Pearl R. | 17 | YZ409 | OP500570 | OP501097 | OP501611 |
|                                 |              |        |         |          |    | YZ410 | OP500571 | OP501098 | OP501612 |
|                                 |              |        |         |          |    | YZ411 | OP500572 | OP501099 | OP501613 |
|                                 |              |        |         |          |    | YZ412 | OP500573 | OP501100 | OP501614 |
|                                 |              |        |         |          |    | YZ413 | OP500574 | OP501101 | OP501615 |
|                                 |              |        |         |          |    | YZ414 | OP500575 | OP501102 | OP501616 |

|                                 |              |        |         |          |    |       |          |          |          |
|---------------------------------|--------------|--------|---------|----------|----|-------|----------|----------|----------|
| Liucheng, Liuzhou, Guangxi (LC) | 26 Nov, 2018 | 24.654 | 109.250 | Pearl R. | 19 | YZ415 | OP500576 | OP501103 | OP501617 |
|                                 |              |        |         |          |    | YZ416 | OP500577 | OP501104 | OP501618 |
|                                 |              |        |         |          |    | YZ417 | OP500578 | OP501105 | OP501619 |
|                                 |              |        |         |          |    | YZ418 | OP500579 | OP501106 | OP501620 |
|                                 |              |        |         |          |    | YZ419 | OP500580 | OP501107 | OP501621 |
|                                 |              |        |         |          |    | YZ420 | OP500581 | OP501108 | OP501622 |
|                                 |              |        |         |          |    | YZ421 | OP500582 | OP501109 | OP501623 |
|                                 |              |        |         |          |    | YZ422 | OP500583 | OP501110 | OP501624 |
|                                 |              |        |         |          |    | YZ423 | OP500584 | OP501111 | OP501625 |
|                                 |              |        |         |          |    | YZ424 | OP500585 | OP501112 | OP501626 |
|                                 |              |        |         |          |    | YZ425 | OP500586 | OP501113 | OP501627 |
|                                 |              |        |         |          |    | LC362 | OP500299 | OP500826 | OP501323 |
|                                 |              |        |         |          |    | LC363 | OP500300 | OP500827 | OP501324 |
|                                 |              |        |         |          |    | LC364 | OP500301 | OP500828 | OP501325 |
|                                 |              |        |         |          |    | LC365 | OP500302 | OP500829 | OP501326 |
|                                 |              |        |         |          |    | LC366 | OP500303 | OP500830 | OP501327 |
|                                 |              |        |         |          |    | LC367 | OP500304 | OP500831 | OP501328 |
|                                 |              |        |         |          |    | LC368 | OP500305 | OP500832 | OP501329 |
|                                 |              |        |         |          |    | LC369 | OP500306 | OP500833 | OP501330 |
|                                 |              |        |         |          |    | LC370 | OP500307 | OP500834 | OP501331 |
|                                 |              |        |         |          |    | LC371 | OP500308 | OP500835 | OP501332 |
|                                 |              |        |         |          |    | LC372 | OP500309 | OP500836 | OP501333 |
|                                 |              |        |         |          |    | LC373 | OP500310 | OP500837 | OP501334 |
|                                 |              |        |         |          |    | LC374 | OP500311 | OP500838 | OP501335 |
|                                 |              |        |         |          |    | LC375 | OP500312 | OP500839 | OP501336 |
|                                 |              |        |         |          |    | LC376 | OP500313 | OP500840 | OP501337 |

|                               |              |        |         |          |    |       |          |          |          |
|-------------------------------|--------------|--------|---------|----------|----|-------|----------|----------|----------|
| Rongan, Liuzhou, Guangxi (RA) | 27 Nov, 2018 | 24.996 | 109.399 | Pearl R. | 28 | LC377 | OP500314 | OP500841 | OP501338 |
|                               |              |        |         |          |    | LC378 | OP500315 | OP500842 | OP501339 |
|                               |              |        |         |          |    | LC379 | OP500316 | OP500843 | OP501340 |
|                               |              |        |         |          |    | LC380 | OP500317 | OP500844 | OP501341 |
|                               |              |        |         |          |    | RA381 | OP500502 | OP501029 | OP501545 |
|                               |              |        |         |          |    | RA382 | OP500503 | OP501030 | OP501546 |
|                               |              |        |         |          |    | RA383 | OP500504 | OP501031 | OP501547 |
|                               |              |        |         |          |    | RA384 | OP500505 | OP501032 | OP501548 |
|                               |              |        |         |          |    | RA385 | OP500506 | OP501033 | OP501549 |
|                               |              |        |         |          |    | RA386 | OP500507 | OP501034 | OP501550 |
|                               |              |        |         |          |    | RA387 | OP500508 | OP501035 | OP501551 |
|                               |              |        |         |          |    | RA388 | OP500509 | OP501036 | OP501552 |
|                               |              |        |         |          |    | RA389 | OP500510 | OP501037 | OP501553 |
|                               |              |        |         |          |    | RA390 | OP500511 | OP501038 | OP501554 |
|                               |              |        |         |          |    | RA391 | OP500512 | OP501039 | OP501555 |
|                               |              |        |         |          |    | RA392 | OP500513 | OP501040 | OP501556 |
|                               |              |        |         |          |    | RA393 | OP500514 | OP501041 | OP501557 |
|                               |              |        |         |          |    | RA394 | OP500515 | OP501042 | OP501558 |
|                               |              |        |         |          |    | RA395 | OP500516 | OP501043 | OP501559 |
|                               |              |        |         |          |    | RA396 | OP500517 | OP501044 | OP501560 |
|                               |              |        |         |          |    | RA397 | OP500518 | OP501045 | OP501561 |
|                               |              |        |         |          |    | RA398 | OP500519 | OP501046 | OP501562 |
|                               |              |        |         |          |    | RA399 | OP500520 | OP501047 | OP501563 |
|                               |              |        |         |          |    | RA400 | OP500521 | OP501048 | OP501564 |
|                               |              |        |         |          |    | RA401 | OP500522 | OP501049 | OP501565 |
|                               |              |        |         |          |    | RA402 | OP500523 | OP501050 | OP501566 |

|                                |              |        |         |          |    |       |          |          |          |
|--------------------------------|--------------|--------|---------|----------|----|-------|----------|----------|----------|
| Luzhai, Liuzhou, Guangxi (LU)  | 20 Oct, 2014 | 24.492 | 109.734 | Pearl R. | 11 | RA403 | OP500524 | OP501051 | OP501567 |
|                                |              |        |         |          |    | RA404 | OP500525 | OP501052 | OP501568 |
|                                |              |        |         |          |    | RA405 | OP500526 | OP501053 | OP501569 |
|                                |              |        |         |          |    | RA406 | OP500527 | OP501054 | OP501570 |
|                                |              |        |         |          |    | RA407 | OP500528 | OP501055 | OP501571 |
|                                |              |        |         |          |    | RA408 | OP500529 | OP501056 | OP501572 |
|                                |              |        |         |          |    | LU317 | OP500393 | OP500920 | OP501414 |
|                                |              |        |         |          |    | LU318 | OP500394 | OP500921 | OP501415 |
|                                |              |        |         |          |    | LU319 | OP500395 | OP500922 | OP501416 |
|                                |              |        |         |          |    | LU320 | OP500396 | OP500923 | OP501417 |
|                                |              |        |         |          |    | LU321 | OP500397 | OP500924 | OP501418 |
| Guiping, Guigang, Guangxi (GP) | 1 Aug, 2018  | 23.392 | 110.089 | Pearl R. | 26 | LU322 | OP500398 | OP500925 | OP501419 |
|                                |              |        |         |          |    | LU323 | OP500399 | OP500926 | OP501420 |
|                                |              |        |         |          |    | LU324 | OP500400 | OP500927 | OP501421 |
|                                |              |        |         |          |    | LU325 | OP500401 | OP500928 | OP501422 |
|                                |              |        |         |          |    | LU326 | OP500402 | OP500929 | OP501423 |
|                                |              |        |         |          |    | LU327 | OP500403 | OP500930 | OP501424 |
|                                |              |        |         |          |    | GP426 | OP500200 | OP500727 | OP501225 |
|                                |              |        |         |          |    | GP427 | OP500201 | OP500728 | OP501226 |
|                                |              |        |         |          |    | GP428 | OP500202 | OP500729 | OP501227 |
|                                |              |        |         |          |    | GP429 | OP500203 | OP500730 | OP501228 |
|                                |              |        |         |          |    | GP430 | OP500204 | OP500731 | OP501229 |
|                                |              |        |         |          |    | GP431 | OP500205 | OP500732 | OP501230 |
|                                |              |        |         |          |    | GP432 | OP500206 | OP500733 | OP501231 |
|                                |              |        |         |          |    | GP433 | OP500207 | OP500734 | OP501232 |
|                                |              |        |         |          |    | GP434 | OP500208 | OP500735 | OP501233 |



|                                    |              |        |         |          |    |       |          |          |          |
|------------------------------------|--------------|--------|---------|----------|----|-------|----------|----------|----------|
|                                    |              |        |         |          |    | GP435 | OP500209 | OP500736 | OP501234 |
|                                    |              |        |         |          |    | GP436 | OP500210 | OP500737 | OP501235 |
|                                    |              |        |         |          |    | GP437 | OP500211 | OP500738 | OP501236 |
|                                    |              |        |         |          |    | GP438 | OP500212 | OP500739 | OP501237 |
|                                    |              |        |         |          |    | GP439 | OP500213 | OP500740 | OP501238 |
|                                    |              |        |         |          |    | GP440 | OP500214 | OP500741 | OP501239 |
|                                    |              |        |         |          |    | GP441 | OP500215 | OP500742 | OP501240 |
|                                    |              |        |         |          |    | GP442 | OP500216 | OP500743 | OP501241 |
|                                    |              |        |         |          |    | GP443 | OP500217 | OP500744 | OP501242 |
|                                    |              |        |         |          |    | GP444 | OP500218 | OP500745 | OP501243 |
|                                    |              |        |         |          |    | GP445 | OP500219 | OP500746 | OP501244 |
|                                    |              |        |         |          |    | GP446 | OP500220 | OP500747 | OP501245 |
|                                    |              |        |         |          |    | GP447 | OP500221 | OP500748 | OP501246 |
|                                    |              |        |         |          |    | GP448 | OP500222 | OP500749 | OP501247 |
|                                    |              |        |         |          |    | GP449 | OP500223 | OP500750 | OP501248 |
|                                    |              |        |         |          |    | GP450 | OP500224 | OP500751 | OP501249 |
|                                    |              |        |         |          |    | GP451 | OP500225 | OP500752 | OP501250 |
| Xindu, Hezhou, Guangxi (XD)        | 17 Sep, 2019 | 23.992 | 111.725 | Pearl R. | 1  | XD328 | OP500539 | OP501066 | OP501580 |
| Zhaoqing, Zhaoqing, Guangdong (ZQ) | 3 Dec, 2018  | 23.041 | 112.467 | Pearl R. | 30 | ZQ276 | OP500587 | OP501114 | OP501628 |
|                                    |              |        |         |          |    | ZQ277 | OP500588 | OP501115 | OP501629 |
|                                    |              |        |         |          |    | ZQ278 | OP500589 | OP501116 | OP501630 |
|                                    |              |        |         |          |    | ZQ279 | OP500590 | OP501117 | OP501631 |
|                                    |              |        |         |          |    | ZQ280 | OP500591 | OP501118 |          |
|                                    |              |        |         |          |    | ZQ281 | OP500592 | OP501119 |          |
|                                    |              |        |         |          |    | ZQ282 | OP500593 | OP501120 |          |
|                                    |              |        |         |          |    | ZQ283 | OP500594 | OP501121 | OP501632 |

|                                |             |        |         |          |    |       |          |          |          |
|--------------------------------|-------------|--------|---------|----------|----|-------|----------|----------|----------|
| Lixi, Qingyuan, Guangdong (LX) | 9 Jan, 2021 | 23.935 | 113.263 | Pearl R. | 28 | ZQ284 | OP500595 | OP501122 | OP501633 |
|                                |             |        |         |          |    | ZQ285 | OP500596 | OP501123 | OP501634 |
|                                |             |        |         |          |    | ZQ286 | OP500597 | OP501124 | OP501635 |
|                                |             |        |         |          |    | ZQ287 | OP500598 | OP501125 | OP501636 |
|                                |             |        |         |          |    | ZQ288 | OP500599 | OP501126 | OP501637 |
|                                |             |        |         |          |    | ZQ289 | OP500600 | OP501127 | OP501638 |
|                                |             |        |         |          |    | ZQ290 | OP500601 | OP501128 | OP501639 |
|                                |             |        |         |          |    | ZQ291 | OP500602 | OP501129 |          |
|                                |             |        |         |          |    | ZQ292 | OP500603 | OP501130 | OP501640 |
|                                |             |        |         |          |    | ZQ293 | OP500604 | OP501131 | OP501641 |
|                                |             |        |         |          |    | ZQ294 | OP500605 | OP501132 |          |
|                                |             |        |         |          |    | ZQ295 | OP500606 | OP501133 | OP501642 |
|                                |             |        |         |          |    | ZQ296 | OP500607 | OP501134 | OP501643 |
|                                |             |        |         |          |    | ZQ297 | OP500608 | OP501135 | OP501644 |
|                                |             |        |         |          |    | ZQ298 | OP500609 | OP501136 | OP501645 |
|                                |             |        |         |          |    | ZQ299 | OP500610 | OP501137 | OP501646 |
|                                |             |        |         |          |    | ZQ300 | OP500611 | OP501138 | OP501647 |
|                                |             |        |         |          |    | ZQ301 | OP500612 | OP501139 | OP501648 |
|                                |             |        |         |          |    | ZQ302 | OP500613 | OP501140 | OP501649 |
|                                |             |        |         |          |    | ZQ303 | OP500614 | OP501141 | OP501650 |
|                                |             |        |         |          |    | ZQ304 | OP500615 | OP501142 | OP501651 |
|                                |             |        |         |          |    | ZQ305 | OP500616 | OP501143 | OP501652 |
|                                |             |        |         |          |    | LX1   | OP500090 | OP500617 | OP501425 |
|                                |             |        |         |          |    | LX2   | OP500100 | OP500627 |          |
|                                |             |        |         |          |    | LX3   | OP500111 | OP500638 | OP501444 |
|                                |             |        |         |          |    | LX4   | OP500112 | OP500639 |          |

|                               |              |        |         |          |    |       |          |          |          |
|-------------------------------|--------------|--------|---------|----------|----|-------|----------|----------|----------|
| Guzhu, Heyuan, Guangdong (GZ) | 24 Nov, 2019 | 23.522 | 114.694 | Pearl R. | 33 | LX5   | OP500113 | OP500640 | OP501445 |
|                               |              |        |         |          |    | LX6   | OP500114 | OP500641 | OP501446 |
|                               |              |        |         |          |    | LX7   | OP500115 | OP500642 | OP501447 |
|                               |              |        |         |          |    | LX8   | OP500116 | OP500643 | OP501448 |
|                               |              |        |         |          |    | LX9   | OP500117 | OP500644 |          |
|                               |              |        |         |          |    | LX10  | OP500091 | OP500618 | OP501426 |
|                               |              |        |         |          |    | LX11  | OP500092 | OP500619 | OP501427 |
|                               |              |        |         |          |    | LX12  | OP500093 | OP500620 | OP501428 |
|                               |              |        |         |          |    | LX13  | OP500094 | OP500621 | OP501429 |
|                               |              |        |         |          |    | LX14  | OP500095 | OP500622 | OP501430 |
|                               |              |        |         |          |    | LX15  | OP500096 | OP500623 | OP501431 |
|                               |              |        |         |          |    | LX16  | OP500097 | OP500624 | OP501432 |
|                               |              |        |         |          |    | LX18  | OP500098 | OP500625 | OP501433 |
|                               |              |        |         |          |    | LX19  | OP500099 | OP500626 | OP501434 |
|                               |              |        |         |          |    | LX20  | OP500101 | OP500628 | OP501435 |
|                               |              |        |         |          |    | LX21  | OP500102 | OP500629 | OP501436 |
|                               |              |        |         |          |    | LX22  | OP500103 | OP500630 | OP501437 |
|                               |              |        |         |          |    | LX23  | OP500104 | OP500631 | OP501438 |
|                               |              |        |         |          |    | LX24  | OP500105 | OP500632 | OP501439 |
|                               |              |        |         |          |    | LX25  | OP500106 | OP500633 |          |
|                               |              |        |         |          |    | LX26  | OP500107 | OP500634 | OP501440 |
|                               |              |        |         |          |    | LX27  | OP500108 | OP500635 | OP501441 |
|                               |              |        |         |          |    | LX28  | OP500109 | OP500636 | OP501442 |
|                               |              |        |         |          |    | LX29  | OP500110 | OP500637 | OP501443 |
|                               |              |        |         |          |    | GZ329 | OP500226 | OP500753 | OP501251 |
|                               |              |        |         |          |    | GZ330 | OP500227 | OP500754 | OP501252 |

|       |          |          |          |
|-------|----------|----------|----------|
| GZ331 | OP500228 | OP500755 | OP501253 |
| GZ332 | OP500229 | OP500756 | OP501254 |
| GZ333 | OP500230 | OP500757 | OP501255 |
| GZ334 | OP500231 | OP500758 | OP501256 |
| GZ335 | OP500232 | OP500759 | OP501257 |
| GZ336 | OP500233 | OP500760 | OP501258 |
| GZ337 | OP500234 | OP500761 | OP501259 |
| GZ338 | OP500235 | OP500762 | OP501260 |
| GZ339 | OP500236 | OP500763 | OP501261 |
| GZ340 | OP500237 | OP500764 | OP501262 |
| GZ341 | OP500238 | OP500765 | OP501263 |
| GZ342 | OP500239 | OP500766 | OP501264 |
| GZ343 | OP500240 | OP500767 | OP501265 |
| GZ344 | OP500241 | OP500768 | OP501266 |
| GZ345 | OP500242 | OP500769 | OP501267 |
| GZ346 | OP500243 | OP500770 | OP501268 |
| GZ347 | OP500244 | OP500771 | OP501269 |
| GZ348 | OP500245 | OP500772 | OP501270 |
| GZ349 | OP500246 | OP500773 | OP501271 |
| GZ350 | OP500247 | OP500774 | OP501272 |
| GZ351 | OP500248 | OP500775 | OP501273 |
| GZ352 | OP500249 | OP500776 | OP501274 |
| GZ353 | OP500250 | OP500777 | OP501275 |
| GZ354 | OP500251 | OP500778 | OP501276 |
| GZ355 | OP500252 | OP500779 | OP501277 |
| GZ356 | OP500253 | OP500780 | OP501278 |

|                                     |              |        |         |           |    |       |          |          |          |
|-------------------------------------|--------------|--------|---------|-----------|----|-------|----------|----------|----------|
| Yangchun, Yangjiang, Guangdong (YC) | 30 Oct, 2018 | 22.173 | 111.777 | Moyang R. | 30 | GZ357 | OP500254 | OP500781 | OP501279 |
|                                     |              |        |         |           |    | GZ358 | OP500255 | OP500782 | OP501280 |
|                                     |              |        |         |           |    | GZ359 | OP500256 | OP500783 | OP501281 |
|                                     |              |        |         |           |    | GZ360 | OP500257 | OP500784 | OP501282 |
|                                     |              |        |         |           |    | GZ361 | OP500258 | OP500785 | OP501283 |
|                                     |              |        |         |           |    | YC223 | OP500540 | OP501067 | OP501581 |
|                                     |              |        |         |           |    | YC224 | OP500541 | OP501068 | OP501582 |
|                                     |              |        |         |           |    | YC225 | OP500542 | OP501069 | OP501583 |
|                                     |              |        |         |           |    | YC226 | OP500543 | OP501070 | OP501584 |
|                                     |              |        |         |           |    | YC227 | OP500544 | OP501071 | OP501585 |
|                                     |              |        |         |           |    | YC228 | OP500545 | OP501072 | OP501586 |
|                                     |              |        |         |           |    | YC229 | OP500546 | OP501073 | OP501587 |
|                                     |              |        |         |           |    | YC230 | OP500547 | OP501074 | OP501588 |
|                                     |              |        |         |           |    | YC231 | OP500548 | OP501075 | OP501589 |
|                                     |              |        |         |           |    | YC232 | OP500549 | OP501076 | OP501590 |
|                                     |              |        |         |           |    | YC233 | OP500550 | OP501077 | OP501591 |
|                                     |              |        |         |           |    | YC234 | OP500551 | OP501078 | OP501592 |
|                                     |              |        |         |           |    | YC235 | OP500552 | OP501079 | OP501593 |
|                                     |              |        |         |           |    | YC236 | OP500553 | OP501080 | OP501594 |
|                                     |              |        |         |           |    | YC237 | OP500554 | OP501081 | OP501595 |
|                                     |              |        |         |           |    | YC238 | OP500555 | OP501082 | OP501596 |
|                                     |              |        |         |           |    | YC239 | OP500556 | OP501083 | OP501597 |
|                                     |              |        |         |           |    | YC240 | OP500557 | OP501084 | OP501598 |
|                                     |              |        |         |           |    | YC241 | OP500558 | OP501085 | OP501599 |
|                                     |              |        |         |           |    | YC242 | OP500559 | OP501086 | OP501600 |
|                                     |              |        |         |           |    | YC243 | OP500560 | OP501087 | OP501601 |

|                                  |              |        |         |         |    |       |          |          |          |
|----------------------------------|--------------|--------|---------|---------|----|-------|----------|----------|----------|
| Huazhou, Maoming, Guangdong (HZ) | 11 Aug, 2018 | 21.650 | 110.632 | Jian R. | 23 | YC244 | OP500561 | OP501088 | OP501602 |
|                                  |              |        |         |         |    | YC245 | OP500562 | OP501089 | OP501603 |
|                                  |              |        |         |         |    | YC246 | OP500563 | OP501090 | OP501604 |
|                                  |              |        |         |         |    | YC247 | OP500564 | OP501091 | OP501605 |
|                                  |              |        |         |         |    | YC248 | OP500565 | OP501092 | OP501606 |
|                                  |              |        |         |         |    | YC249 | OP500566 | OP501093 | OP501607 |
|                                  |              |        |         |         |    | YC250 | OP500567 | OP501094 | OP501608 |
|                                  |              |        |         |         |    | YC251 | OP500568 | OP501095 | OP501609 |
|                                  |              |        |         |         |    | YC252 | OP500569 | OP501096 | OP501610 |
|                                  |              |        |         |         |    | HZ253 | OP500276 | OP500803 | OP501301 |
|                                  |              |        |         |         |    | HZ254 | OP500277 | OP500804 | OP501302 |
|                                  |              |        |         |         |    | HZ255 | OP500278 | OP500805 | OP501303 |
|                                  |              |        |         |         |    | HZ256 | OP500279 | OP500806 | OP501304 |
|                                  |              |        |         |         |    | HZ257 | OP500280 | OP500807 | OP501305 |
|                                  |              |        |         |         |    | HZ258 | OP500281 | OP500808 | OP501306 |
|                                  |              |        |         |         |    | HZ259 | OP500282 | OP500809 | OP501307 |
|                                  |              |        |         |         |    | HZ260 | OP500283 | OP500810 | OP501308 |
|                                  |              |        |         |         |    | HZ261 | OP500284 | OP500811 | OP501309 |
|                                  |              |        |         |         |    | HZ262 | OP500285 | OP500812 | OP501310 |
|                                  |              |        |         |         |    | HZ263 | OP500286 | OP500813 | OP501311 |
|                                  |              |        |         |         |    | HZ264 | OP500287 | OP500814 | OP501312 |
|                                  |              |        |         |         |    | HZ265 | OP500288 | OP500815 | OP501313 |
|                                  |              |        |         |         |    | HZ266 | OP500289 | OP500816 | OP501314 |
|                                  |              |        |         |         |    | HZ267 | OP500290 | OP500817 | OP501315 |
|                                  |              |        |         |         |    | HZ268 | OP500291 | OP500818 | OP501316 |
|                                  |              |        |         |         |    | HZ269 | OP500292 | OP500819 | OP501317 |

|                                      |              |        |         |         |    |       |          |          |          |
|--------------------------------------|--------------|--------|---------|---------|----|-------|----------|----------|----------|
| Lianjiang, Zhanjiang, Guangdong (LJ) | 17 Jul, 2020 | 21.718 | 110.313 | Lian R. | 30 | HZ270 | OP500293 | OP500820 | OP501318 |
|                                      |              |        |         |         |    | HZ271 | OP500294 | OP500821 | OP501319 |
|                                      |              |        |         |         |    | HZ272 | OP500295 | OP500822 | OP501320 |
|                                      |              |        |         |         |    | HZ273 | OP500296 | OP500823 |          |
|                                      |              |        |         |         |    | HZ274 | OP500297 | OP500824 | OP501321 |
|                                      |              |        |         |         |    | HZ275 | OP500298 | OP500825 | OP501322 |
|                                      |              |        |         |         |    | LJ1   | OP500365 | OP500892 | OP501384 |
|                                      |              |        |         |         |    | LJ2   | OP500376 | OP500903 | OP501395 |
|                                      |              |        |         |         |    | LJ3   | OP500385 | OP500912 | OP501406 |
|                                      |              |        |         |         |    | LJ4   | OP500387 | OP500914 | OP501408 |
|                                      |              |        |         |         |    | LJ5   | OP500388 | OP500915 | OP501409 |
|                                      |              |        |         |         |    | LJ6   | OP500389 | OP500916 | OP501410 |
|                                      |              |        |         |         |    | LJ7   | OP500390 | OP500917 | OP501411 |
|                                      |              |        |         |         |    | LJ8   | OP500391 | OP500918 | OP501412 |
|                                      |              |        |         |         |    | LJ9   | OP500392 | OP500919 | OP501413 |
|                                      |              |        |         |         |    | LJ10  | OP500366 | OP500893 | OP501385 |
|                                      |              |        |         |         |    | LJ11  | OP500367 | OP500894 | OP501386 |
|                                      |              |        |         |         |    | LJ12  | OP500368 | OP500895 | OP501387 |
|                                      |              |        |         |         |    | LJ13  | OP500369 | OP500896 | OP501388 |
|                                      |              |        |         |         |    | LJ14  | OP500370 | OP500897 | OP501389 |
|                                      |              |        |         |         |    | LJ15  | OP500371 | OP500898 | OP501390 |
|                                      |              |        |         |         |    | LJ16  | OP500372 | OP500899 | OP501391 |
|                                      |              |        |         |         |    | LJ17  | OP500373 | OP500900 | OP501392 |
|                                      |              |        |         |         |    | LJ18  | OP500374 | OP500901 | OP501393 |
|                                      |              |        |         |         |    | LJ19  | OP500375 | OP500902 | OP501394 |
|                                      |              |        |         |         |    | LJ20  | OP500377 | OP500904 | OP501396 |

|                                 |              |        |         |           |    |       |          |          |          |
|---------------------------------|--------------|--------|---------|-----------|----|-------|----------|----------|----------|
| Lingao, Lingao, Hainan (Hainan) | 16 Jul, 2014 | 19.935 | 109.706 | Wenlan R. | 20 | LJ21  | OP500378 | OP500905 | OP501397 |
|                                 |              |        |         |           |    | LJ22  | OP500379 | OP500906 | OP501398 |
|                                 |              |        |         |           |    | LJ23  | OP500380 | OP500907 | OP501399 |
|                                 |              |        |         |           |    | LJ24  |          |          | OP501400 |
|                                 |              |        |         |           |    | LJ25  | OP500381 | OP500908 | OP501401 |
|                                 |              |        |         |           |    | LJ26  |          |          | OP501402 |
|                                 |              |        |         |           |    | LJ27  | OP500382 | OP500909 | OP501403 |
|                                 |              |        |         |           |    | LJ28  | OP500383 | OP500910 | OP501404 |
|                                 |              |        |         |           |    | LJ29  | OP500384 | OP500911 | OP501405 |
|                                 |              |        |         |           |    | LJ30  | OP500386 | OP500913 | OP501407 |
|                                 |              |        |         |           |    | LG461 | OP500345 | OP500872 | OP501369 |
|                                 |              |        |         |           |    | LG462 | OP500346 | OP500873 | OP501370 |
|                                 |              |        |         |           |    | LG463 | OP500347 | OP500874 | OP501371 |
|                                 |              |        |         |           |    | LG464 | OP500348 | OP500875 | OP501372 |
|                                 |              |        |         |           |    | LG465 | OP500349 | OP500876 |          |
|                                 |              |        |         |           |    | LG466 | OP500350 | OP500877 | OP501373 |
|                                 |              |        |         |           |    | LG467 | OP500351 | OP500878 | OP501374 |
|                                 |              |        |         |           |    | LG468 | OP500352 | OP500879 | OP501375 |
|                                 |              |        |         |           |    | LG469 | OP500353 | OP500880 |          |
|                                 |              |        |         |           |    | LG470 | OP500354 | OP500881 | OP501376 |
|                                 |              |        |         |           |    | LG472 | OP500355 | OP500882 | OP501377 |
|                                 |              |        |         |           |    | LG473 | OP500356 | OP500883 | OP501378 |
|                                 |              |        |         |           |    | LG474 | OP500357 | OP500884 | OP501379 |
|                                 |              |        |         |           |    | LG475 | OP500358 | OP500885 | OP501380 |
|                                 |              |        |         |           |    | LG476 | OP500359 | OP500886 | OP501381 |
|                                 |              |        |         |           |    | LG477 | OP500360 | OP500887 | OP501382 |



|                                   |              |        |         |          |    |       |          |          |          |
|-----------------------------------|--------------|--------|---------|----------|----|-------|----------|----------|----------|
| Nanfeng, Danzhou, Hainan (Hainan) | 29 Oct, 2019 | 19.391 | 109.547 | Nandu R. | 20 | LG478 | OP500361 | OP500888 |          |
|                                   |              |        |         |          |    | LG479 | OP500362 | OP500889 |          |
|                                   |              |        |         |          |    | LG480 | OP500363 | OP500890 | OP501383 |
|                                   |              |        |         |          |    | LG481 | OP500364 | OP500891 |          |
|                                   |              |        |         |          |    | NF482 | OP500430 | OP500957 | OP501475 |
|                                   |              |        |         |          |    | NF483 | OP500431 | OP500958 | OP501476 |
|                                   |              |        |         |          |    | NF484 | OP500432 | OP500959 | OP501477 |
|                                   |              |        |         |          |    | NF485 | OP500433 | OP500960 | OP501478 |
|                                   |              |        |         |          |    | NF486 | OP500434 | OP500961 | OP501479 |
|                                   |              |        |         |          |    | NF487 | OP500435 | OP500962 | OP501480 |
|                                   |              |        |         |          |    | NF488 | OP500436 | OP500963 | OP501481 |
|                                   |              |        |         |          |    | NF489 | OP500437 | OP500964 | OP501482 |
|                                   |              |        |         |          |    | NF490 | OP500438 | OP500965 | OP501483 |
|                                   |              |        |         |          |    | NF491 | OP500439 | OP500966 | OP501484 |
|                                   |              |        |         |          |    | NF492 | OP500440 | OP500967 | OP501485 |
|                                   |              |        |         |          |    | NF493 | OP500441 | OP500968 | OP501486 |
|                                   |              |        |         |          |    | NF494 | OP500442 | OP500969 | OP501487 |
|                                   |              |        |         |          |    | NF495 | OP500443 | OP500970 | OP501488 |
|                                   |              |        |         |          |    | NF496 | OP500444 | OP500971 | OP501489 |
|                                   |              |        |         |          |    | NF497 | OP500445 | OP500972 | OP501490 |
| Baisha, Baisha, Hainan (BS)       | 28 Oct, 2019 | 19.222 | 109.450 | Nandu R. | 30 | NF498 | OP500446 | OP500973 | OP501491 |
|                                   |              |        |         |          |    | NF499 | OP500447 | OP500974 | OP501492 |
|                                   |              |        |         |          |    | NF500 | OP500448 | OP500975 | OP501493 |
|                                   |              |        |         |          |    | NF501 | OP500449 | OP500976 | OP501494 |
|                                   |              |        |         |          |    | BS86  | OP500162 | OP500689 | OP501188 |
|                                   |              |        |         |          |    | BS87  | OP500163 | OP500690 | OP501189 |

|       |          |          |          |
|-------|----------|----------|----------|
| BS88  | OP500164 | OP500691 | OP501190 |
| BS89  | OP500165 | OP500692 | OP501191 |
| BS90  | OP500166 | OP500693 | OP501192 |
| BS91  | OP500167 | OP500694 | OP501193 |
| BS92  | OP500168 | OP500695 | OP501194 |
| BS93  | OP500169 | OP500696 | OP501195 |
| BS94  | OP500170 | OP500697 | OP501196 |
| BS95  | OP500171 | OP500698 | OP501197 |
| BS96  | OP500172 | OP500699 | OP501198 |
| BS97  | OP500173 | OP500700 | OP501199 |
| BS98  | OP500174 | OP500701 | OP501200 |
| BS99  | OP500175 | OP500702 | OP501201 |
| BS100 | OP500146 | OP500673 | OP501172 |
| BS101 | OP500147 | OP500674 | OP501173 |
| BS102 | OP500148 | OP500675 | OP501174 |
| BS103 | OP500149 | OP500676 | OP501175 |
| BS104 | OP500150 | OP500677 | OP501176 |
| BS105 | OP500151 | OP500678 | OP501177 |
| BS106 | OP500152 | OP500679 | OP501178 |
| BS107 | OP500153 | OP500680 | OP501179 |
| BS108 | OP500154 | OP500681 | OP501180 |
| BS109 | OP500155 | OP500682 | OP501181 |
| BS110 | OP500156 | OP500683 | OP501182 |
| BS111 | OP500157 | OP500684 | OP501183 |
| BS112 | OP500158 | OP500685 | OP501184 |
| BS113 | OP500159 | OP500686 | OP501185 |

|                             |              |        |         |             |    |       |          |          |          |
|-----------------------------|--------------|--------|---------|-------------|----|-------|----------|----------|----------|
| Ledong, Ledong, Hainan (LD) | 27 Oct, 2019 | 18.752 | 109.175 | Changhua R. | 27 | BS114 | OP500160 | OP500687 | OP501186 |
|                             |              |        |         |             |    | BS115 | OP500161 | OP500688 | OP501187 |
|                             |              |        |         |             |    | LD31  | OP500318 | OP500845 | OP501342 |
|                             |              |        |         |             |    | LD32  | OP500319 | OP500846 | OP501343 |
|                             |              |        |         |             |    | LD33  | OP500320 | OP500847 | OP501344 |
|                             |              |        |         |             |    | LD34  | OP500321 | OP500848 | OP501345 |
|                             |              |        |         |             |    | LD35  | OP500322 | OP500849 | OP501346 |
|                             |              |        |         |             |    | LD36  | OP500323 | OP500850 | OP501347 |
|                             |              |        |         |             |    | LD37  | OP500324 | OP500851 | OP501348 |
|                             |              |        |         |             |    | LD38  | OP500325 | OP500852 | OP501349 |
|                             |              |        |         |             |    | LD39  | OP500326 | OP500853 | OP501350 |
|                             |              |        |         |             |    | LD40  | OP500327 | OP500854 | OP501351 |
|                             |              |        |         |             |    | LD41  | OP500328 | OP500855 | OP501352 |
|                             |              |        |         |             |    | LD42  | OP500329 | OP500856 | OP501353 |
|                             |              |        |         |             |    | LD43  | OP500330 | OP500857 | OP501354 |
|                             |              |        |         |             |    | LD44  | OP500331 | OP500858 | OP501355 |
|                             |              |        |         |             |    | LD45  | OP500332 | OP500859 | OP501356 |
|                             |              |        |         |             |    | LD46  | OP500333 | OP500860 | OP501357 |
|                             |              |        |         |             |    | LD47  | OP500334 | OP500861 | OP501358 |
|                             |              |        |         |             |    | LD48  | OP500335 | OP500862 | OP501359 |
|                             |              |        |         |             |    | LD49  | OP500336 | OP500863 | OP501360 |
|                             |              |        |         |             |    | LD50  | OP500337 | OP500864 | OP501361 |
|                             |              |        |         |             |    | LD51  | OP500338 | OP500865 | OP501362 |
|                             |              |        |         |             |    | LD52  | OP500339 | OP500866 | OP501363 |
|                             |              |        |         |             |    | LD53  | OP500340 | OP500867 | OP501364 |
|                             |              |        |         |             |    | LD54  | OP500341 | OP500868 | OP501365 |

|                                   |              |        |         |            |    |      |          |          |          |
|-----------------------------------|--------------|--------|---------|------------|----|------|----------|----------|----------|
| Qiongzong, Qiongzong, Hainan (QZ) | 30 Oct, 2019 | 19.036 | 109.842 | Wanquan R. | 28 | LD55 | OP500342 | OP500869 | OP501366 |
|                                   |              |        |         |            |    | LD56 | OP500343 | OP500870 | OP501367 |
|                                   |              |        |         |            |    | LD57 | OP500344 | OP500871 | OP501368 |
|                                   |              |        |         |            |    | QZ58 | OP500474 | OP501001 | OP501517 |
|                                   |              |        |         |            |    | QZ59 | OP500475 | OP501002 | OP501518 |
|                                   |              |        |         |            |    | QZ60 | OP500476 | OP501003 | OP501519 |
|                                   |              |        |         |            |    | QZ61 | OP500477 | OP501004 | OP501520 |
|                                   |              |        |         |            |    | QZ62 | OP500478 | OP501005 | OP501521 |
|                                   |              |        |         |            |    | QZ63 | OP500479 | OP501006 | OP501522 |
|                                   |              |        |         |            |    | QZ64 | OP500480 | OP501007 | OP501523 |
|                                   |              |        |         |            |    | QZ65 | OP500481 | OP501008 | OP501524 |
|                                   |              |        |         |            |    | QZ66 | OP500482 | OP501009 | OP501525 |
|                                   |              |        |         |            |    | QZ67 | OP500483 | OP501010 | OP501526 |
|                                   |              |        |         |            |    | QZ68 | OP500484 | OP501011 | OP501527 |
|                                   |              |        |         |            |    | QZ69 | OP500485 | OP501012 | OP501528 |
|                                   |              |        |         |            |    | QZ70 | OP500486 | OP501013 | OP501529 |
|                                   |              |        |         |            |    | QZ71 | OP500487 | OP501014 | OP501530 |
|                                   |              |        |         |            |    | QZ72 | OP500488 | OP501015 | OP501531 |
|                                   |              |        |         |            |    | QZ73 | OP500489 | OP501016 | OP501532 |
|                                   |              |        |         |            |    | QZ74 | OP500490 | OP501017 | OP501533 |
|                                   |              |        |         |            |    | QZ75 | OP500491 | OP501018 | OP501534 |
|                                   |              |        |         |            |    | QZ76 | OP500492 | OP501019 | OP501535 |
|                                   |              |        |         |            |    | QZ77 | OP500493 | OP501020 | OP501536 |
|                                   |              |        |         |            |    | QZ78 | OP500494 | OP501021 | OP501537 |
|                                   |              |        |         |            |    | QZ79 | OP500495 | OP501022 | OP501538 |
|                                   |              |        |         |            |    | QZ80 | OP500496 | OP501023 | OP501539 |

|                                |              |        |         |            |   |       |          |          |          |
|--------------------------------|--------------|--------|---------|------------|---|-------|----------|----------|----------|
| Wenjiao, Wenchang, Hainan (WJ) | 16 Jul, 2014 | 19.665 | 110.907 | Wenjiao R. | 9 | QZ81  | OP500497 | OP501024 | OP501540 |
|                                |              |        |         |            |   | QZ82  | OP500498 | OP501025 | OP501541 |
|                                |              |        |         |            |   | QZ83  | OP500499 | OP501026 | OP501542 |
|                                |              |        |         |            |   | QZ84  | OP500500 | OP501027 | OP501543 |
|                                |              |        |         |            |   | QZ85  | OP500501 | OP501028 | OP501544 |
|                                |              |        |         |            |   | WJ452 | OP500530 | OP501057 |          |
|                                |              |        |         |            |   | WJ453 | OP500531 | OP501058 | OP501573 |
|                                |              |        |         |            |   | WJ454 | OP500532 | OP501059 | OP501574 |
|                                |              |        |         |            |   | WJ455 | OP500533 | OP501060 | OP501575 |
|                                |              |        |         |            |   | WJ456 | OP500534 | OP501061 | OP501576 |
|                                |              |        |         |            |   | WJ457 | OP500535 | OP501062 | OP501577 |
|                                |              |        |         |            |   | WJ458 | OP500536 | OP501063 | OP501578 |
|                                |              |        |         |            |   | WJ459 | OP500537 | OP501064 | OP501579 |
|                                |              |        |         |            |   | WJ460 | OP500538 | OP501065 |          |

---
