# Supplementary figures and images for: Genetic Structure of an East Asian Minnow (Toxabramis houdemeri) in Southern China, with Implications for Conservation
Source: MDPI journal article supplement (doi:10.3390/biology11111641), 2022-11-09

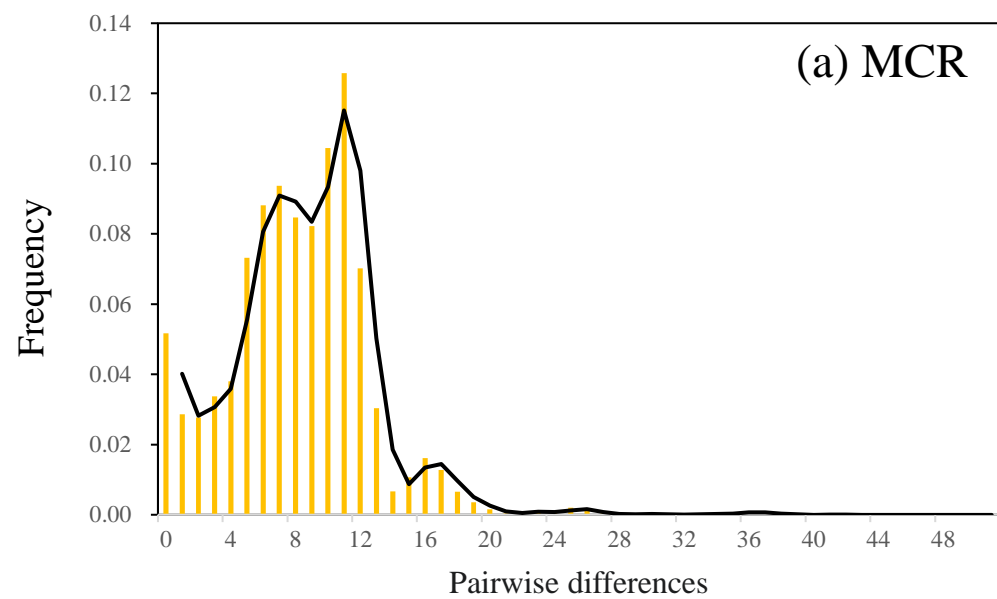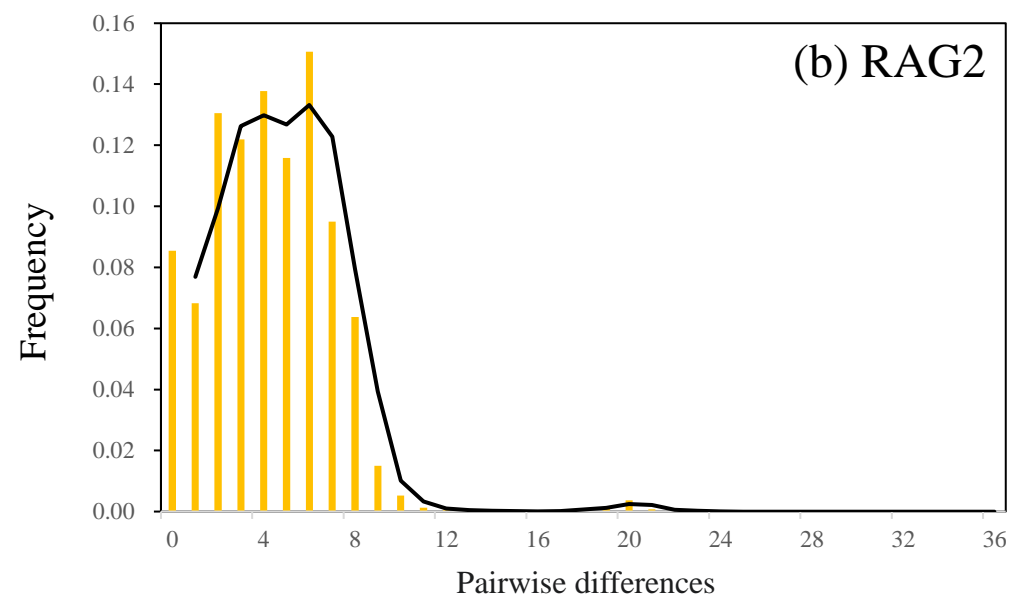

Supplement: s1 [file s1]
